# Supplementary material for: Core Control Principles of the Eukaryotic Cell Cycle
Source: Research Square preprint supplement (doi:10.21203/rs.3.rs-1008929/v1), 2021-10-27
Supplement: Supplementary file 1 [file 5f974854f29690632e0a8135.xlsx]

## Sheet: Sheet1
Systematic ID	Uniprot ID	Gene names	Sequence window	Amino acid	Position	Cut12+ average phosphorylation	Cut12ΔPP1 average phosphorylation	Cut12+ maximum phosphorylation	Cut12ΔPP1 maximum phosphorylation	Localization probability	Protein names	Phosphorylation Multiplicity	Gene name Synonyms	S. cerevisiae ortholog	Human ortholog
SPCC285.13c	O74500	nup60	ESGVSSEPRARTSSLTPGNTPNSAKQWSAFR	T	201	0.171975	0.435878	0.935893	1.28989	0.999993	Nucleoporin nup60	3		NUP60
SPCC285.13c	O74500	nup60	SSEPRARTSSLTPGNTPNSAKQWSAFRSTFS	T	205	0.171975	0.435878	0.935893	1.28989	0.999997	Nucleoporin nup60	3		NUP60
SPCC285.13c	O74500	nup60	ESGVSSEPRARTSSLTPGNTPNSAKQWSAFR	T	201	0.250893	0.472912	1.12723	1.29423	0.999993	Nucleoporin nup60	2		NUP60
SPCC285.13c	O74500	nup60	SSEPRARTSSLTPGNTPNSAKQWSAFRSTFS	T	205	0.250893	0.472912	1.12723	1.29423	0.999997	Nucleoporin nup60	2		NUP60
SPCC285.13c	O74500	nup60	LLPAQRLSYYGPTLSTPYNRRLRHKRHSTTP	T	251	0.276468	0.689029	1.18562	1.97781	0.986718	Nucleoporin nup60	1		NUP60
SPCC285.13c	O74500	nup60	KAGSPQSAPSKASYISPYARPGITTSRRRHD	S	359	0.333414	0.819298	1.32015	2.73559	1	Nucleoporin nup60	1		NUP60
SPAC1952.16	Q9UUJ3	rga9	TPPVEIERALTPITTSPQKLKLPRSSSPCKN	S	645	0.212928	0.274841	0.370083	0.474249	0.995281	Probable Rho-GTPase-activating protein 9	3
SPCC962.06c	O74555	bpb1	_MLNSRSVGSTGSNNTPLGRRRFDEKPDSLP	T	15	0.209445	0.191382	0.477075	0.607453	0.999996	Branchpoint-bridging protein	1	ods3;sf1	MSL5	SF1
SPAC19E9.01c	O13838	nup40	TNRSTLKPLSVDDLRSPSPQKEYRGFRTSVS	S	25	0.232731	0.142347	0.426195	0.412414	0.956221	Nucleoporin nup40	1		ASM4;NUP53	NUP35
SPAC23G3.04	Q9P7S9	ies4	NDELAESSKPSSGAATPTRSAPKSSAGLINS	T	90	0.291915	0.219253	0.503208	0.447168	0.94688	INO80 complex subunit 4	3		IES4
SPBC146.03c	P41004	cut3	KGIFRTSSTPSIVDVTPDRGERPRKLVRSVL	T	19	0.254148	0.281744	0.480146	0.515873	1	Structural maintenance of chromosomes protein 4	3	smc4	SMC4	SMC4
SPBC9B6.03	Q9Y7M3	SPBC9B6.03	SGHGPLSRLNIYSGASPYTQRVRPSYELIEA	S	23	0.247348	0.426443	0.692	1.1219	0.999939	FYVE-type zinc finger-containing protein C9B6.03	1		PIB2	ZFYVE16;ZFYVE9
SPCC285.13c	O74500	nup60	AAASLLSILDSKEKNTPSITAKAGSPQSAPS	T	338	0.237776	0.392899	0.763411	0.928599	0.997847	Nucleoporin nup60	1		NUP60
SPBC1347.02	O74191	fkbp39	KKKRTKDESEQEEAASPKKNNTKKQKVEGTP	S	199	0.2229	0.381323	0.831251	1.29366	1	FK506-binding protein 39 kDa	2	fkbp39	FPR3;FPR4
SPAC15A10.16	O13735	fat1	RGFLRDSSKPDNIMDSPSPKVSKRPSIVRQD	S	293	0.223819	0.399606	0.757709	1.01782	0.999982	Actin-interacting protein 3 homolog	2	aip3;fat1;SPAC15E1.01	BUD6	KIAA1217;SRCIN1
SPAC23C11.16	P50528	plo1	RTDEVDNDRILPSVLSPRDRVNPVMKIGPET	S	370	0.234068	0.479864	0.740183	1.37235	1	Serine/threonine-protein kinase plo1	1		CDC5	PLK1;PLK2;PLK3
SPBC146.03c	P41004	cut3	DRGERPRKLVRSVLESPSQKDVASIVKIEQT	S	36	0.263392	0.290765	0.707532	0.757969	0.999973	Structural maintenance of chromosomes protein 4	2	smc4	SMC4	SMC4
SPAC30D11.10	P36592	rad22	VVSAPFTNNFNPRLDSPSIRKTSIIDHSKSL	S	365	0.220636	0.329409	0.605814	0.760461	0.999731	DNA repair and recombination protein rad22	1	rad22;rad22A	RAD52	RAD52
SPBC146.03c	P41004	cut3	KGIFRTSSTPSIVDVTPDRGERPRKLVRSVL	T	19	0.242854	0.308494	0.587943	0.68025	1	Structural maintenance of chromosomes protein 4	2	smc4	SMC4	SMC4
SPAC3F10.15c	Q10189	spo12	PKHALNVASPTDSLMSPCTAKLQAHKKKYYM	S	54	0.139498	0.21393	0.599835	0.617839	0.999954	Mitosis-specific protein spo12	2	wis3	BNS1;SPO12
SPBC4F6.12	O74398	SPBC4F6.12	_____________MHSPIPELPRFERRLTGP	S	3	0.144027	0.281179	0.582067	0.874753	1	LIM domain-containing protein C4F6.12	1		PXL1	LPXN;PXN;TGFB1I1
SPBC6B1.04	O43068	mde4	LRMQKKSTERKSLLVSPRVSSPKLFSPSKQA	S	242	0.137843	0.273293	0.684111	0.885606	1	Monopolin complex subunit mde4	2		LRS4
SPCC1672.02c	P40847	sap1	PKMELKSYKRKNASLSPSSSPAKAQRTHLSL	S	19	0.145541	0.293751	0.682642	0.843616	0.999517	Switch-activating protein 1	3
SPAC1782.09c	Q9P7H1	clp1	EDSEIQNDDETRTVGTPTETISVVRLRRSSS	T	453	0.192472	0.256656	0.592971	0.693112	0.998085	Tyrosine-protein phosphatase CDC14 homolog	1	flp1	CDC14	CDC14A;CDC14B
SPBC428.17c	O94364	wpl1	KKQRVVSNPDLSLPSSPVKQILRNGLQNSKY	S	65	0.17985	0.248729	0.648641	0.758593	0.999931	Wings apart-like protein homolog 1	3		RAD61	WAPL
SPBC146.03c	P41004	cut3	DRGERPRKLVRSVLESPSQKDVASIVKIEQT	S	36	0.108019	0.159568	0.404617	0.524434	0.999973	Structural maintenance of chromosomes protein 4	3	smc4	SMC4	SMC4
SPAC1782.09c	Q9P7H1	clp1	EDSEIQNDDETRTVGTPTETISVVRLRRSSS	T	453	0.100369	0.397828	0.429312	1.11925	0.998085	Tyrosine-protein phosphatase CDC14 homolog	2	flp1	CDC14	CDC14A;CDC14B
SPCC285.13c	O74500	nup60	TPNSAKQWSAFRSTFSPLREQDQLSTISPNS	S	220	0.109232	0.330968	0.543821	0.958722	0.999999	Nucleoporin nup60	2		NUP60
SPBC1A4.03c	P08096	top2	PEDDDDDFIIPGSSSTPKASSTNAEPPEDSD	T	1417	0.126208	0.164575	0.325509	0.321023	0.872927	DNA topoisomerase 2	1	ptr11	TOP2	TOP2A;TOP2B
SPCC16C4.07	O74452	scw1	FSANSAFSTTSPPPLTPSTSRDYPFSASTIS	T	375	0.139028	0.323032	0.383077	0.887644	0.9908	Cell wall integrity protein scw1	2		WHI3;WHI4
SPBC1711.05	Q9P785	SPBC1711.05	TPFTRVGDPSQWDFASPALRDNSFNFEDDYG	S	395	0.121468	0.159357	0.345804	0.499176	1	LisH domain-containing protein C1711.05	1		SRP40	NOLC1
SPBC28E12.03	O74360	rga4	TSPSKYGYVSGRIALSPIHLRGALRDVTNKC	S	353	0.349414	0.488556	0.745986	0.943802	1	Probable Rho-type GTPase-activating protein 4	1		RGA1;RGA2	CHN1;CHN2
SPAC9G1.10c	O14306	SPAC9G1.10c	LNIGDRSLETPPPIPSPRPPQPVAVEAIQQS	S	274	0.23164	0.40919	0.568156	1.11792	0.999147	Probable inositol polyphosphate 5-phosphatase C9G1.10c	2		INP53	INPP5J
SPBC13E7.07	Q9P6R3	SPBC13E7.07	TDVEDTQKLEQKHSTTPSSLKMKSSISLAAI	T	147	0.258943	0.460982	0.57436	1.23468	0.86017	Uncharacterized protein C13E7.07	1
SPAC1F3.06c	Q10411	spo15	LGSSEGSTASSALPLTPRSPSNASWLLVRGG	T	102	0.05782	0.0893993	0.187456	0.278642	1	Sporulation-specific protein 15	2
